# Supplementary material
Source: ML conference proceedings conference paper supplement (https://proceedings.neurips.cc/paper_files/paper/2022/hash/c58437945392cec01e0c75ff6cef901a-Abstract.html)
Supplement: Supplementary file 1 [file c58437945392cec01e0c75ff6cef901a-Supplemental-Conference.zip]

Archive with 1 entries (1 files):
- NeurIPS_2022_Supplementary_Final.pdf
